# Supplementary material for: Elucidating the evolutionary history and expression patterns of nucleoside phosphorylase paralogs (vegetative storage proteins) in Populus and the plant kingdom
Source: PubMed Central journal article supplement (PMC3751785; doi:10.1186/1471-2229-13-118), 2013-08-19
Supplement: 1471-2229-13-118-S3.pdf [file 1471-2229-13-118-S3.pdf]

Taxonomic family

- Brassicaceae
- Euphorbiaceae
- Poaceae
- Rosaceae
- Salicaceae

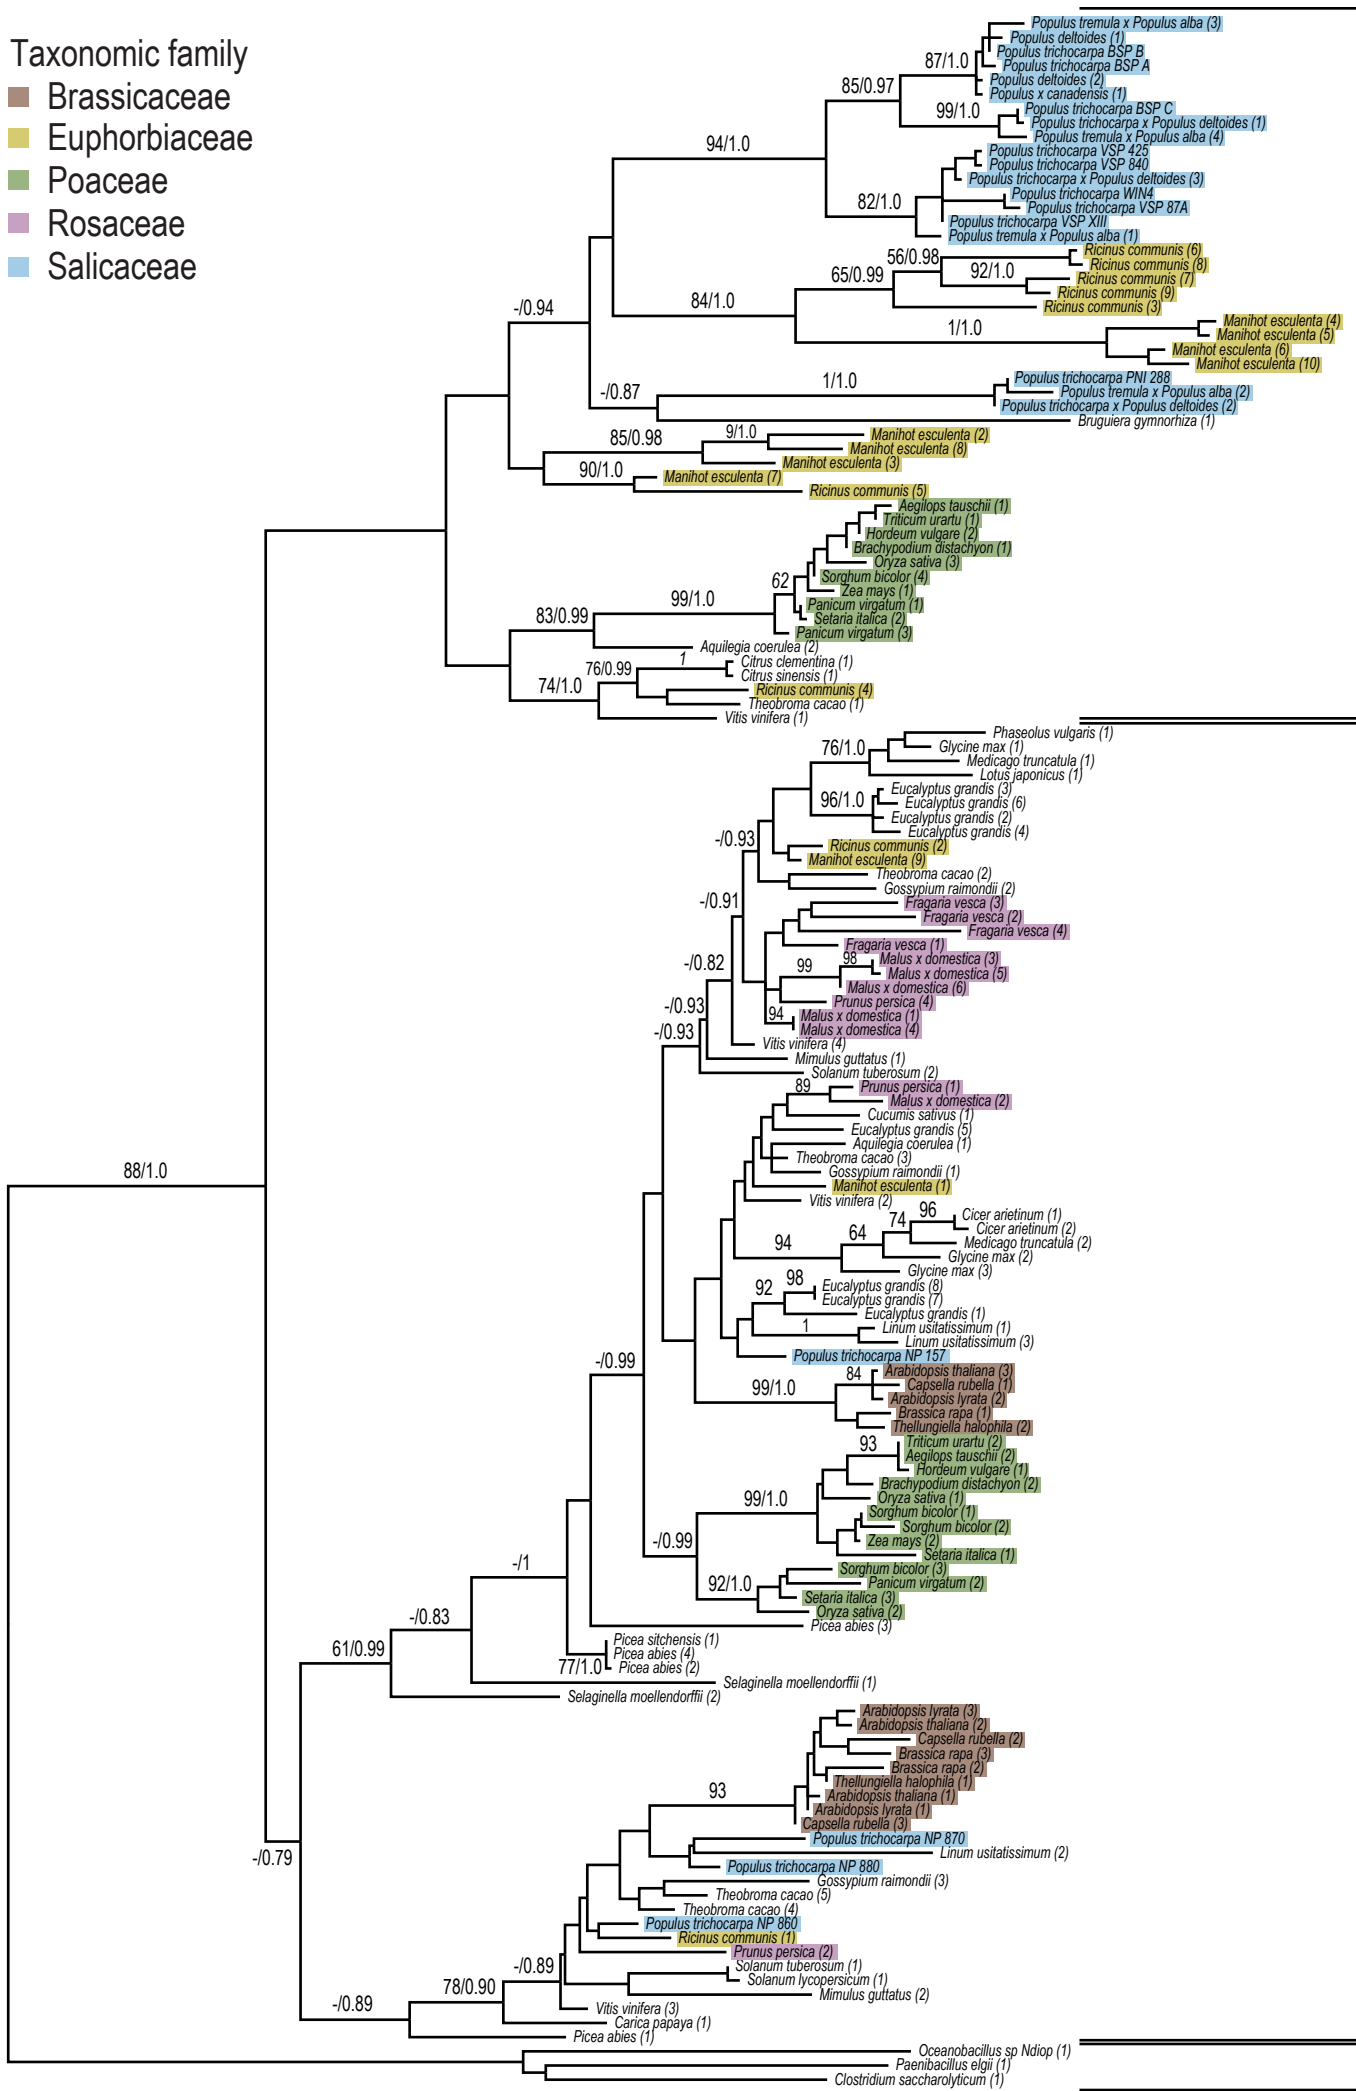

Group II

Group I

Bacterial outgroup

0.2

Inferred # of substitutions per site
