# Supplementary material for: Elucidating the evolutionary history and expression patterns of nucleoside phosphorylase paralogs (vegetative storage proteins) in Populus and the plant kingdom
Source: BMC Plant Biol. 2013 Aug 19;13:118. doi: 10.1186/1471-2229-13-118 (PMC3751785; doi:10.1186/1471-2229-13-118)
Supplement: Additional file 8: Figure S2 — Alignment of motifs predicted by MEME for bacterial and plant nucleoside phosphorylase (NP) proteins. Bacterial amino acid sequences were retrieved from the Conserved Domain Database (CDD, http://www.ncbi.nlm.nih.gov/Structure/cdd/cdd.shtml) from the NP family (COG0775) and plant amino sequences were retrieved from Phytozome (http://www.phytozome.net). [file 1471-2229-13-118-S8.pdf]

20

*P V Y G T P E V R Q H V F F V P*                      *P Y V D L A G M F*

$$F \quad . \quad G \quad . \quad G K G \quad V \quad . \quad L V M \quad . \quad G K \quad . \quad . \quad R K V N A A$$

*T T L L L . . F . . I . . G A G . . P S L*

$$\begin{array}{ccccccc} \boxed{\text{S D V}} & \text{I} & \boxed{\text{F I}} & \text{K} & \text{I} & \boxed{\text{W A}} & \text{H} & \text{I} & \boxed{\text{S E W}} & \text{N} & \text{W} & \text{Q} & \text{R} & \boxed{\text{F S}} & - & \text{S} & \text{G} & \text{I} & \boxed{\text{S I}} & \boxed{\text{E}} \\ \text{C D V} & & \text{I} & & \text{A} & & & & \text{W} & & & & & \text{E C A} & & & & \text{B C} & & & \end{array}$$

**F G D - - Y N V P E N G D N L L G S V W Y O P E E I F P V**

-----  
**G T P E E A R Q H V F W V P V D S S W Y L A T K L E D L K**
